# Supplementary material
Source: PubMed Central journal article supplement (PMC4227438)
Supplement: Supp_Fig1.pdf [file Supp_Fig1.pdf]

## Supplementary Data

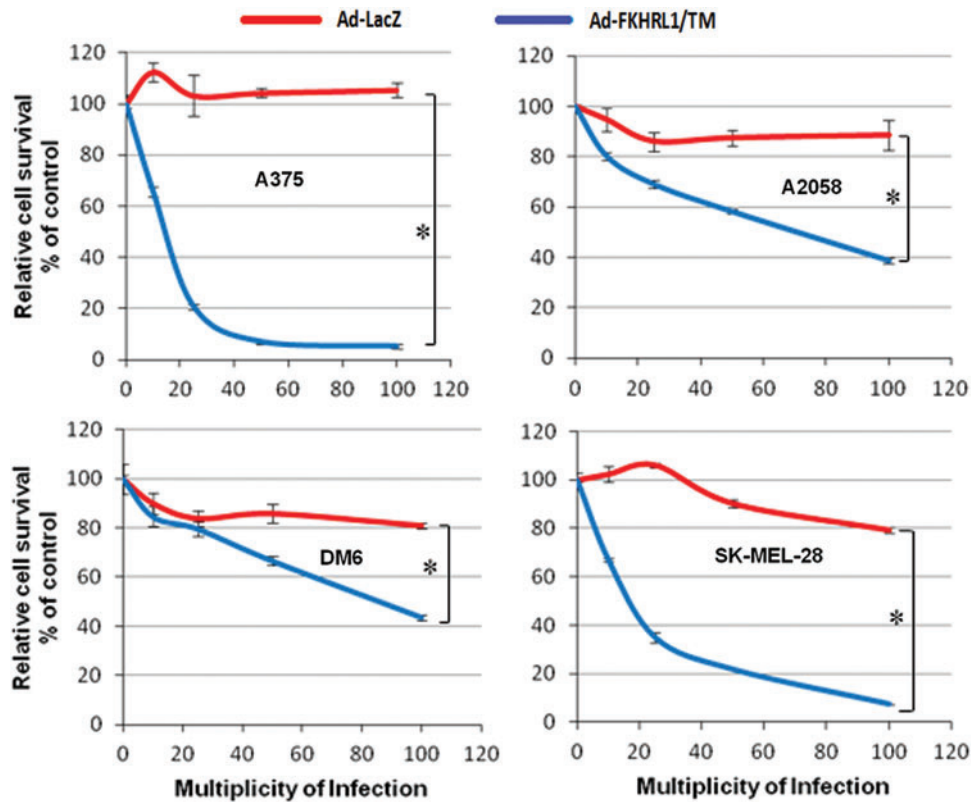

**SUPPLEMENTARY FIG. S1.** Ad-FKHRL1/TM is cytotoxic to melanoma cells *in vitro*. Multiple human melanoma cell lines were treated at the indicated multiplicity of infection (MOI) with Ad-LacZ or Ad-FKHRL1/TM. Cell viability was determined by MTT assay 72 hours following treatment and reported as percentage of control (untreated). Assays were measured in triplicate. Experiments were repeated at least three times; figure shows a representative single experiment. Cell viability across the virus doses was statistically different between Ad-LacZ and Ad-FKHRL1/TM for all cell types by two-way ANOVA ( $*p < 0.0001$  for all cell types). Error bars represent one standard deviation.
