# Supplementary material
Source: PubMed Central journal article supplement (PMC4227438)
Supplement: Supp_Fig2.pdf [file Supp_Fig2.pdf]

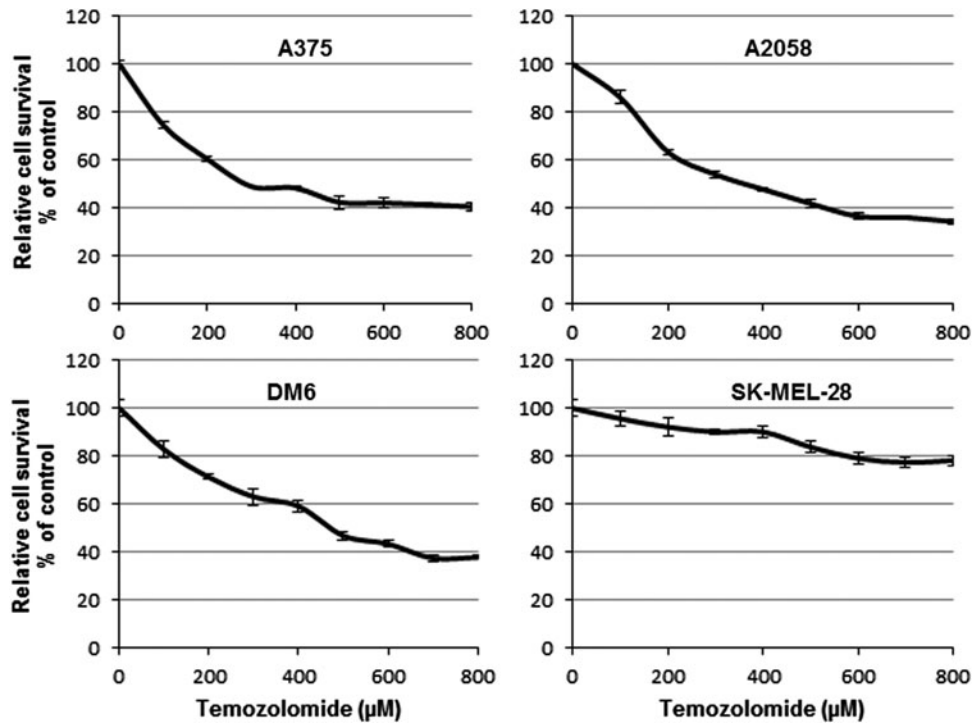

**SUPPLEMENTARY FIG. S2.** Human melanoma cells have variable sensitivity to temozolomide *in vitro*. Multiple human melanoma cell lines were treated at the indicated concentrations of temozolomide. Cell viability was determined by MTT assay 72 hours following treatments and reported as percentage of control (untreated). Assays were measured in triplicate. Experiments were repeated at least three times; figure shows a representative single experiment. Cell viability was statistically different across temozolomide doses for all cell types by one-way ANOVA ( $p < 0.0001$  for all cell types). Error bars represent one standard deviation.
