# Supplementary material
Source: PubMed Central journal article supplement (PMC4227438)
Supplement: Supp_Fig3.pdf [file Supp_Fig3.pdf]

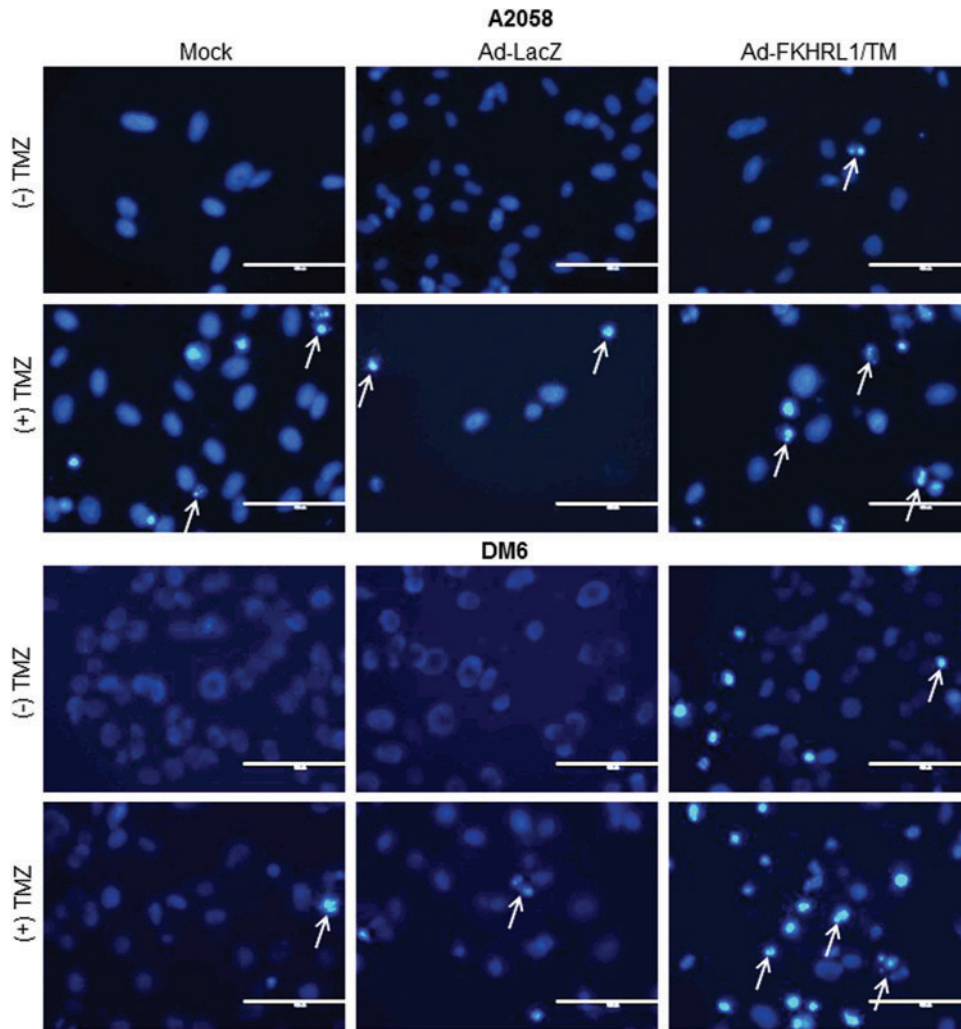

**SUPPLEMENTARY FIG. S3.** Combination of Ad-FKHRL1/TM with TMZ significantly increases nuclei fragmentation. Human melanoma cell lines were treated with Ad-FKHRL1/TM and TMZ alone or in combination at the following doses, (Ad-FKHRL1/TM, TMZ): A2058 (50 MOI, 400  $\mu$ M), DM6 (50 MOI, 400  $\mu$ M). Forty-eight h after treatment, Hoechst staining was performed by adding Hoechst 33342 dye to a final concentration of 2  $\mu$ M. Condensation and fragmentation of nuclei (examples indicated by white arrows) were visualized at 40 $\times$  magnification with the EVOS FL Imaging System under 357/44 (nm) and 447/60 (nm) excitation and emission visualization, (scale bar=400  $\mu$ m). One representative experiment is shown from three performed.
