# Supplementary material
Source: PubMed Central journal article supplement (PMC4227438)
Supplement: Supp_Fig4.pdf [file Supp_Fig4.pdf]

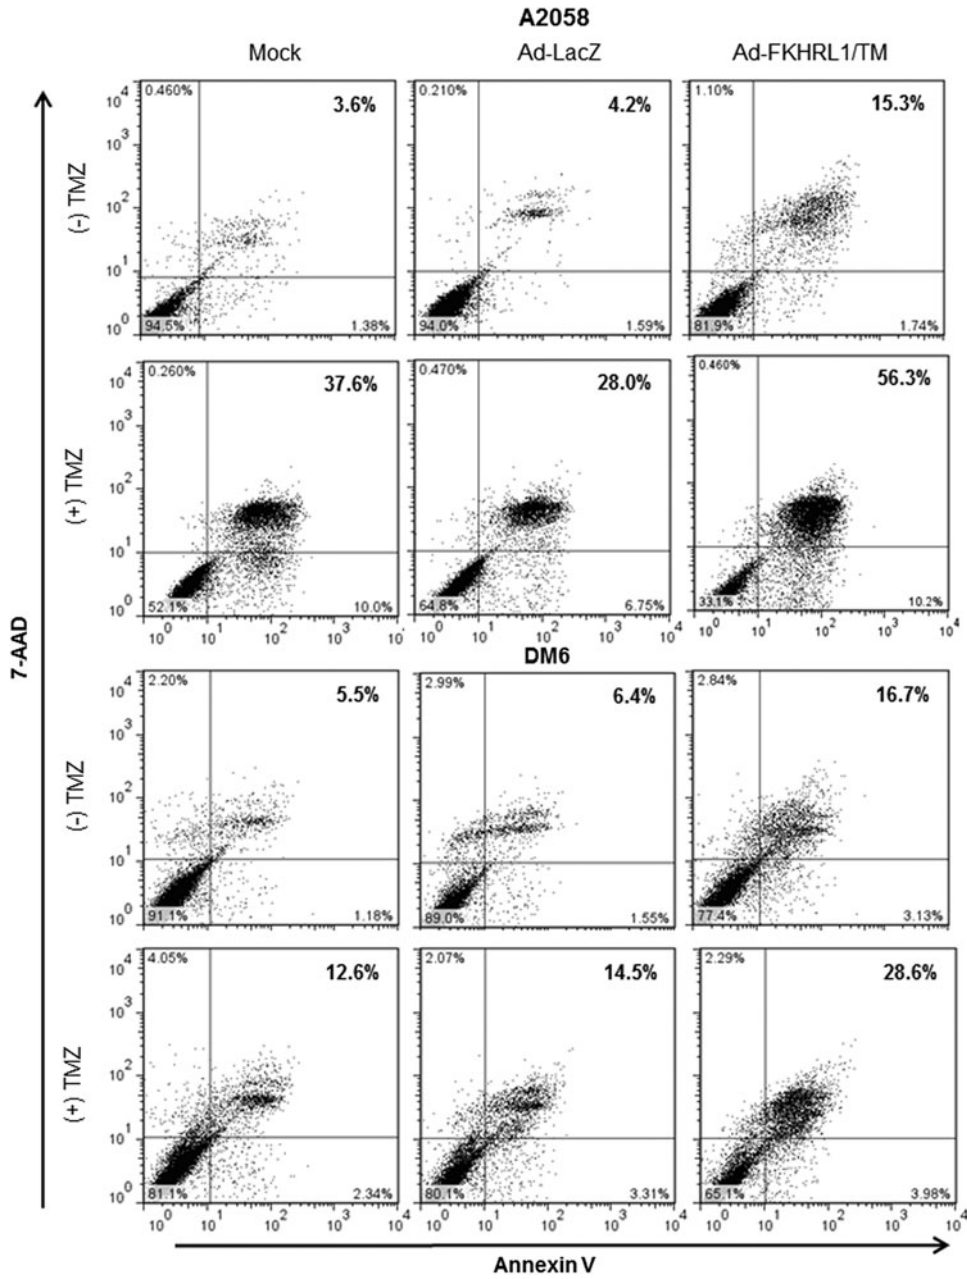

**SUPPLEMENTARY FIG. S4.** Combination of Ad-FKHRL1/TM with TMZ significantly increases the percentage of apoptosis. Human melanoma cell lines were treated with Ad-FKHRL1/TM and TMZ alone or in combination at the following doses, (Ad-FKHRL1/TM, TMZ): A2058 (50 MOI, 400  $\mu$ M), DM6 (50 MOI, 400  $\mu$ M). Forty-eight h after treatment, cells were stained with annexin V-PE and 7-Aminoactinomycin D (7-AAD); positive cells for annexin V-PE and 7-AAD staining were analyzed by FACScan flow cytometer with FlowJo software. Similar results were obtained in three independent experiments. A representative experiment is shown.
