# Supplementary material
Source: PubMed Central journal article supplement (PMC4227438)
Supplement: Supp_Fig5.pdf [file Supp_Fig5.pdf]

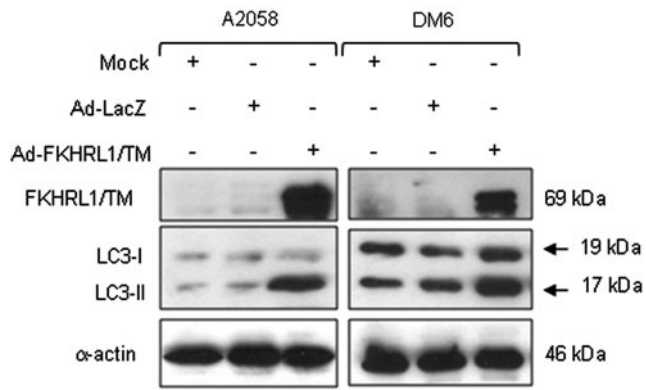

**SUPPLEMENTARY FIG. S5.** Overexpression of FKHRL1/TM induces accumulation of LC3-II in melanoma cells. A2058 and DM6 melanoma cells were not infected (mock) or infected with Ad-LacZ or Ad-FKHRL1/TM at 100 MOI, at 24h after infection, expression of FKHRL1/TM, LC3-I and II and  $\alpha$ -actin were analyzed by Western Blot, a representative experiment is shown from three performed.
